# Sub-cellular dynamic investigation of the multi-component drug on the gastric cancer cell BGC823 using Raman spectroscopy

Wenhao Shang,<sup>1,2</sup> Teng Fang,<sup>1</sup> Anpei Ye<sup>\*,1,2</sup>

<sup>1</sup>Key Laboratory for the Physics and Chemistry of Nanodevices, School of Electronics, Peking University, Beijing 100871, China

<sup>2</sup>Biomed-X Research Center, Academy for Advanced Interdisciplinary Studies, Peking University, Beijing 100871, China

\*Corresponding author: [yap@pku.edu.cn](mailto:yap@pku.edu.cn)

*KEYWORD sub-cellular, dynamic, drug CKI, intracellular vesicles, Raman spectroscopy*

---

**ABSTRACT :** The potential of Raman spectroscopy in anticancer drug study has been demonstrated, yet its ability to character systematic cellular changes caused by multi-component drugs has not been explored. Here we used micro-Raman spectroscopy combined with bright field imaging to study Compound Kushen injection (CKI) at a sub-cellular level including intracellular vesicles(IVs). In our report, CKI caused dysfunction of DNA replication and repair was displayed by Raman spectrum (RS) from the cell nucleus. Meanwhile, the dynamics of CKI induced intracellular vesicles and cell component deconstruction was delineated by RS from the cytoplasm and IVs. The lipids-related biomolecular changes were also presented by the cytoplasm RS: the lipids level in the cytoplasm first descended then uprising. In conclusion, this study validated the mechanism and displayed the dynamics of CKI in treating cancer cells. We proved the capability of subcellular micro-Raman spectroscopy for detecting systematic cellular changes and its application for multi-component drug evaluation.

---

1 “Multiple component-therapeutics” anticancer drugs such as Traditional Chinese Medicines  
2 (TCMs) have gained more and more attention in drug discovery<sup>1</sup>. The main advantages of  
3 TCMs are their function on improving the efficacy of cancer therapy and reducing side effects  
4 and complications<sup>2, 3</sup>, also on modulating immune function and improving the quality of life of  
5 cancer patients in clinical use<sup>4</sup>. Compound Kushen injection (CKI) is a National Medical  
6 Products Administration approved TCM formula used in the clinical treatment of various  
7 types of cancers in China<sup>5</sup>The chemical fingerprint of CKI contains at least 8 different  
8 components, with primary compounds Matrine and Oxymatrine<sup>6</sup>. It has been shown multiple

9 bioactive ingredients in CKI deliver an integrated anti-tumor effect through multiple targets  
10 and their associated molecular pathways<sup>7</sup>. CKI is proved to suppress cell cycle and DNA  
11 repair pathways, even reducing the metabolism level in cancer cells<sup>8</sup>. Studies proved that  
12 Matrine could inhibit cell proliferation and introduce apoptosis in various cancer types via  
13 different molecular pathways<sup>8,9</sup>. In human HepG2 cells, Matrine induced autophagy in a  
14 dose-dependent manner<sup>10</sup> In short, the existence of CKI multiple bioactive ingredients causes  
15 multi-level cellular changes from morphology to DNA replication/repair inhibition, cell  
16 proliferation inhibition, autophagy, and apoptosis<sup>1, 8, 11, 12</sup>.

17 Micro-Raman spectroscopy (RS), known as molecular fingerprint spectroscopy, is a label-free  
18 and noninvasive technique to characterize the chemicals component and content in cell  
19 samples<sup>13, 14</sup>. The application of RS in drug screening and investigation of cell response  
20 profiles has been explored in many anticancer drugs such as cisplatin (an alkylating and DNA  
21 binding agent), doxorubicin, vincristine, paclitaxel ect<sup>15-18</sup>. Some of the studies even explored  
22 the study of the anticancer drug at the subcellular level<sup>15, 19-21</sup>. However, the potential of RS  
23 for multi-component drug study has not been explored for its complex cell response.  
24 Meanwhile, the drug-induced intracellular vesicles (0.4-1um) activity has not been  
25 investigated at sub-cellular RS study, due to the difficulty of acquiring RS with a high  
26 resolution.

27 In this report, we used CKI as a demo for demonstrating RS potential for multi-component  
28 drug study at the subcellular level including intracellular vesicle activity. Using a custom-built  
29 532nm laser Raman platform with a high-NA (numeric aperture) objective (100×/ 1.46)  
30 enables us to characterize the dynamics of cell intracellular vesicles-related cell activities at  
31 around 200nm resolution. We used CKI and 5-fluorouracil (5Fu, as a reference) to treat  
32 gastric cancer cell line BGC-823 at different drug concentrations and time points. First,  
33 Cytotoxicity assays and Trypan blue cell counting was conducted to verify CKI effects on cell  
34 proliferation and viability inhibition, and also identified the equivalent cytotoxicity effect  
35 concentration of CKI and 5FU. Subsequently, the nucleus RS of cells was collected after CKI  
36 5Fu was treated for verifying the CKI induced DNA replication/repair and proliferation  
37 inhibition. To delineate the dynamics of CKI induced intracellular vesicles, cell images, cell  
38 cytoplasm, and vesicles RS signals of the same cell were collected at the same time.

## 39 **EXPERIMENTAL SECTION**

### 40 **Cell culture and drugs**

41 CKI with a total alkaloid concentration of 20.4 mg/ml in 5 ml ampoules, human BGC823 gastric  
42 carcinoma cells, and 5-Fluorouracil were provided by Beijing Cancer Hospital. The cell culture  
43 method has been described in our previous work<sup>14</sup>. In short, BGC-823 cell was placed in  
44 standard culture medium: RPMI-1640 medium (Macgene, Hangzhou, China) supplemented  
45 with 10% fetal bovine serum (Tianhang Biological Technology Co. Ltd., Beijing, China) with  
46 antibiotics and cultured at 37 °C with a relative humidity of 95% and 5% CO<sub>2</sub>. After cells  
47 reached 40% confluence the cell culture was replaced by drug mixed ones.

## 48 **Cell viability and Live-cell counting**

49 The cholecystokinin (CCK-8) assay experiment was conducted to evaluate the anticancer effect  
50 of CKI. The wells of 96-well trays were seeded with  $1 \times 10^4$  cells suspended BGC-823 cells in 100  
51  $\mu\text{L}$  of medium and cultured overnight. Next, we cultured and tested the cell viability treated by  
52 CKI(2mg/ml,1mg/ml) and 5-FU (10ug/ml) for 24, 48, and 72 hours, following the procedure  
53 described previously<sup>14</sup>. In the meanwhile, live-cell counting was performed in parallel with RS  
54 data collection using a hemocytometer since the dead cells were marked by trypan blue but the  
55 living cells were not<sup>22</sup>.

## 56 **Sub-cellular Raman spectroscopy & bright filed cell imaging**

57 We constructed an optical configuration for the 532nm laser stimulated back-scattering RS  
58 collection and cell imaging as described previously<sup>23, 24</sup>. Especially, a quite high-NA (numeric  
59 aperture) objective (100 $\times$ / 1.46 oil, N-Achroplan, Zeiss, Oberkochen, Germany) was used herein  
60 to achieve sub-cellular high-resolution Raman Spectroscopy. The size of the laser spot on the  
61 cells can be estimated by the Bassel function for a Gaussian laser beam,  $D_{\text{min}}=1.22\lambda/\text{NA}$ , where  
62  $\lambda=532\text{nm}$  is the wavelength of the laser, and  $D_{\text{min}}$  is the diameter of the Airy disc which contains  
63 84% of the whole laser beam energy<sup>25</sup>. In our experiment, the theoretical value of  $D_{\text{min}}$  was about  
64 444nm. Normally, the size of BGC823 cells ranges from 10 $\mu\text{m}$  to 20 $\mu\text{m}$ , and the size of observed  
65 intracellular vesicles (IVs) are from 0.4 $\mu\text{m}$  to 0.9 $\mu\text{m}$ . Thus, we were able to detect RS signals from  
66 the sub-cellular structures. It should be noted that with the high NA objective the system could  
67 only achieve high spatial resolution in the x-y plane, not in the z-direction. Therefore, the RS  
68 signal of vesicles inevitably includes the contribution from the cytoplasm. However, since RS  
69 signal intensity is directly proportional to the excited power, and the light strength is sharply  
70 decreased outside the focal point of the laser when the laser was precisely focused on vesicles,  
71 most of the RS signal we collected come from the IVs rather than the cytoplasm around the  
72 vesicles. Thus, we could approximately see it as the RS of IVs. In our experiment, the laser power  
73 was 14 mW at the focal plane of the objective and the integration time was the 30s for each  
74 spectrum acquisition. Meantime, we collected the bright-field images for each cell synced with  
75 RS measurements. As a result, more than 25 cells were collected for each different condition  
76 (Untreated, CKI 1mg/ml, CKI 2mg/ml, 5Fu 10ug/ml), respectively.

77 The RS analysis was performed using OriginPro (2019b, OriginLab Corporaton.US) and in-house  
78 scripts based on the R (3.6.1), and MATLAB (2019b, The MathWorks, Inc. US). For each  
79 spectrum, the cosmic rays were firstly removed from raw data, then 3rd-order Polynomial Curve  
80 Fitting was conducted to remove the background envelopes followed by smoothing with 5-point  
81 Savitzky-Golay, the spectral region from 500  $\text{cm}^{-1}$  to 1800  $\text{cm}^{-1}$  that contained abundant  
82 biomedical signals remained. All the RS was normalized by area. As our previous work showed<sup>16</sup>,  
83 the area under the RS curve is a more suitable and accurate index.

## 84 **RESULTS & DISCUSSIONS**

### 85 **Inhibition of cellular proliferation and viability**

86 MTT assays (CCK8) were conducted to measure cell viability after treating with different doses  
87 of CKI at 24h, 48h, 72h to quantitatively validate the effect of CKI on cell proliferation in gastric  
88 cancer BGC-823 cell line. Figure 1. a attests that the cell viability of BGC-823 cells was  
89 significantly inhibited by a high dose of CKI (2mg/ml, based on the total alkaloid concentration in  
90 CKI) and 5Fu(10ug/ml). The cell numbers were counted by Trypan blue staining (only live cells  
91 were counted). Figure 1. b shows that the live cell numbers were greatly decreased by CKI  
92 2mg/ml and 5Fu 10ug/ml. As shown above, CKI worked in a dose-dependent manner which is  
93 consistent with the previous reports<sup>26</sup>. In short, the results validated CKI inhibited proliferation and  
94 viability of BGC-823 cells, and displayed CKI 2mg/ml and 5Fu 10ug had an equivalent cytotoxic

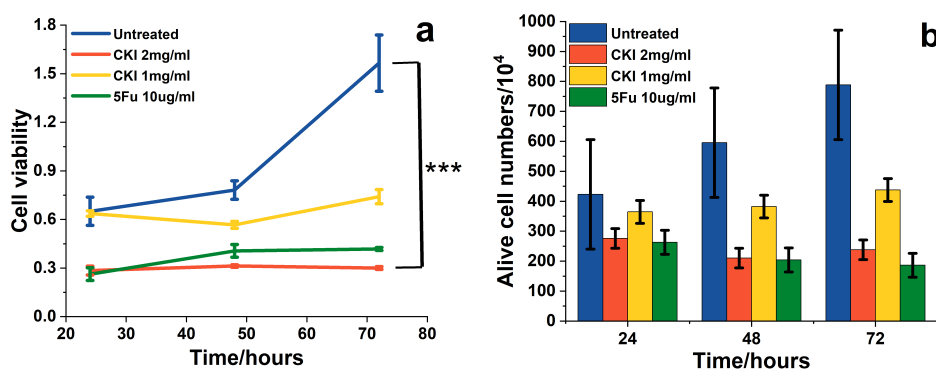

Figure1: CKI inhibited proliferation and cell viability. a) Inhibition of BGC823 cell viability with CKI. The viability was measured by CCK8 kit (MTT). b) The numbers of different drug-treated conditions were counted after Trypan Blue stain. Data are represented as mean  $\pm$ SEM. a, Two-way ANOVA \*\*\* $<$ 0.01.

95 effect. It should be noted that the concentrations of CKI are very high (in mg/ml range) and out of  
96 the physiological range. Here we just highlight the effects of the drug.

### 97 **The nucleic acid decrease in the cell nucleus**

98 The cell nucleus area, containing most of the cell DNA and in charge of RNA (mRNA, tRNA, rRNA)  
99 synthesis, is the main target of anticancer drugs. 5Fu exerts its anticancer effects through  
100 inhibition of thymidylate synthase and incorporation of its metabolites into RNA and DNA then  
101 disrupting normal DNA and RNA processing and function and the inhibited thymidylate is  
102 necessary for DNA replication and repair<sup>27</sup>. CKI can increase the level of DNA double-strand  
103 breaks (DSBs) and inhibit DNA repair and replication<sup>28-30</sup>. We used the RS from the cell nucleus  
104 to validate the drug effect on nucleic acid components. By comparing the RS alterations (figure 2),  
105 the difference of cells after CKI and 5Fu treatment were displayed by those RS peaks related to  
106 nucleic acids and other cell components. In eukaryotic cells, the 794 cm<sup>-1</sup>, 941 cm<sup>-1</sup>, 1092 cm<sup>-1</sup>  
107 and 1579 cm<sup>-1</sup> band of RS corresponds to nucleic acid components<sup>31</sup>. The characteristic peaks  
108 are assigned in Table (Table S1) based on previous studies involving several cell lines and  
109 biomolecules.<sup>31-36</sup> Figure 2 and Figure S3 shows that the Raman spectra profile of treated groups  
110 were decreased after 24h, which mainly reflected in those Raman bands assigned to nucleic acid:  
111 794 cm<sup>-1</sup>(DNA), 941cm<sup>-1</sup>(RNA), 1092 cm<sup>-1</sup>(DNA), 1375 cm<sup>-1</sup>(A, G, T) 1579 cm<sup>-1</sup>(DNA). The

112 changes at 48h shown in figure S1 were similar to those at 24h. The decrease of DNA and RNA  
113 components at the nucleus validated CKI and 5Fu effect on cell DNA and RNA.

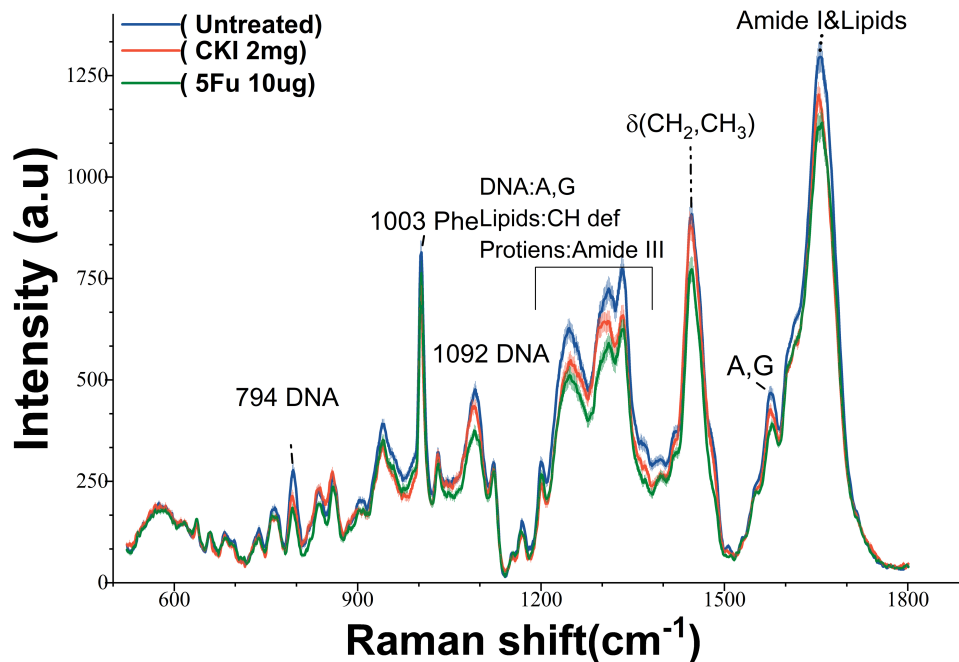

Figure 2: Nucleus area RS in BGC-823 treated with CKI or 5Fu. the Nucleus RS at 24h (mean  $\pm$ s.e.m., the light shadow represents the s.e.m)

114 To quantitatively compare the difference of nucleic acid reduction between CKI and 5Fu, we  
115 compared the 794 cm<sup>-1</sup> intensity and the area under the peaks from 1287-1343 cm<sup>-1</sup> (mainly  
116 reflected the A C G in nucleic acid). Pair-wise comparisons involving more than two groups were  
117 evaluated using the appropriate Bonferroni corrections and a one-way ANOVA test was  
118 conducted with  $p < 0.05$ . Both CKI and 5Fu had significantly reduced those nucleic acid signals.  
119 While 5Fu had a stronger nucleic acid inhibition effect, which is understandable since 5Fu inhibits  
120 thymidylate synthase and incorporates its metabolites into RNA and DNA rather than only  
121 involving in DSBs and DNA repair.

122 Additionally, the strong signal at 1653 cm<sup>-1</sup>, encompassing contributions from protein  $\nu$ (C=O)  
123 (amide I), lipids  $\nu$ (C=C), decreased in intensity after the drug-treated (Figure. 2 e). The proteins  
124 and lipids decrease also confirmed by characteristic peaks at 1003 cm<sup>-1</sup>(Phenylalanine), 1313  
125 cm<sup>-1</sup>(carbohydrates) 1334 cm<sup>-1</sup>(CH<sub>3</sub>/CH<sub>2</sub> wagging, protein), 1446 cm<sup>-1</sup>(CH<sub>2</sub> bending).  
126 Surprisingly, for CKI-treated groups at 48h the relative intensity increased, and its position at 1656  
127 cm<sup>-1</sup>,1454 cm<sup>-1</sup>, 1304 cm<sup>-1</sup>,1092 cm<sup>-1</sup> was slightly shifted(Figure S1), which should be resulted

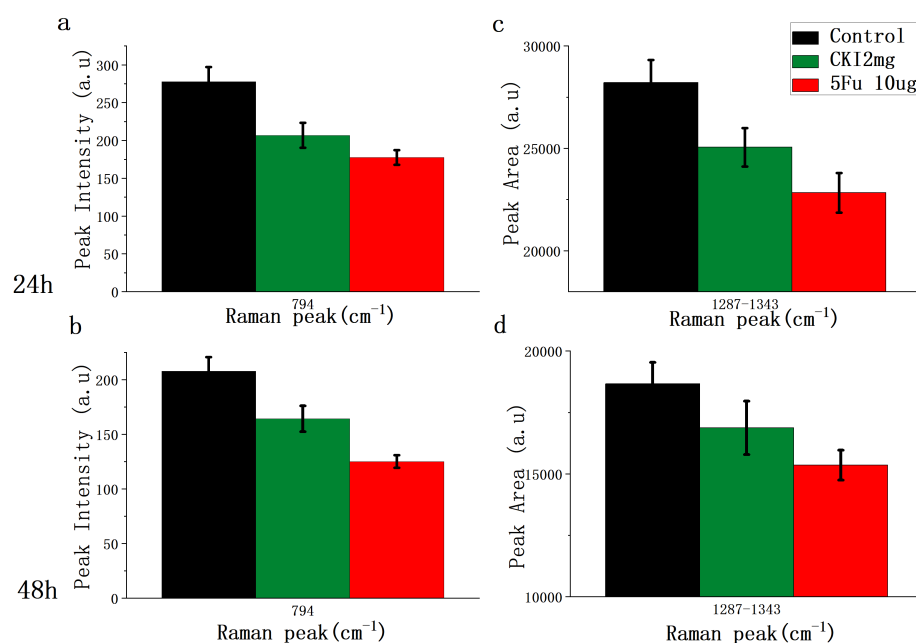

Figure 3: Bar plot of RS at 794 cm<sup>-1</sup> and 1297-1343cm<sup>-1</sup> a,b) The RS intensity at 794 cm<sup>-1</sup> of different groups(control black,CKI 2mg green,5Fu10ug red)at 24h and 48h; c,d) The area under spectrum from 1297cm<sup>-1</sup> to 1343cm<sup>-1</sup>different groups at 24h and 48h. Mean  $\pm$  s.e.m., (the three groups were compared by a one-way ANOVA, and  $P < 0.05$  in each figure)

128 from the increase of nearby lipids bands.<sup>35</sup>These RS changes in DNA and RNA components from  
129 the cell nucleus validate CKI and 5Fu effect on the nucleic acid.

### 130 Intracellular vesicles accumulation

131 Many studies show that CKI can induce cell apoptosis<sup>5, 8, 29</sup>, which is characterized by a series of  
132 common morphological and biochemical features that include cell shrinkage, membrane blebbing,  
133 nuclear condensation, DNA fragmentation, mitochondrial fragmentation<sup>37</sup>. CKI was also shown to  
134 cause cell autophagy<sup>10</sup>, characterized by the appearance of a double-or multi-membrane  
135 cytosolic vesicle for degradation of the cell component<sup>37-39</sup>. Moreover, autophagy-triggered cell  
136 death as autophagy is, strictly speaking, a mode of cell survival, but persistent autophagy  
137 generally triggers apoptosis<sup>40</sup>

138 Thus, the monitor of the intracellular vesicles (IVs) and related cytoplasm dynamics would be one  
139 of the keys to investigating the CKI anticancer effect. Due to the small size (0.4-1um) of IVs, a  
140 high-NA objective(100X/1.46) was applied to acquire high-spatial-resolution RS(around 200nm,  
141 see method for details). For detecting the cell morphology changes and IVs activity, we collected  
142 plenty of cellular photographs under the bright-filed imaging and measured corresponding the

143 RSs of the IVs and cytoplasm for the same cell in different treatment conditions and time points,  
144 respectively.

145 The remarkable morphological changes were observed under CKI treated groups both at 24h  
146 and 48h (figure 4 b, e; figure 5 b). Abundant cytoplasmic vesicles (pointed out by white arrows in  
147 figure 5 b) with varying sizes (0.4-1 $\mu$ m) were only observed in BGC823 cells treated by CKI.  
148 However, the cell size did not remarkably change. As for 5Fu-treated BGC823 cells, the size was  
149 larger than those of the untreated group(figure 4 c,f), which consists of our former work<sup>41</sup>.

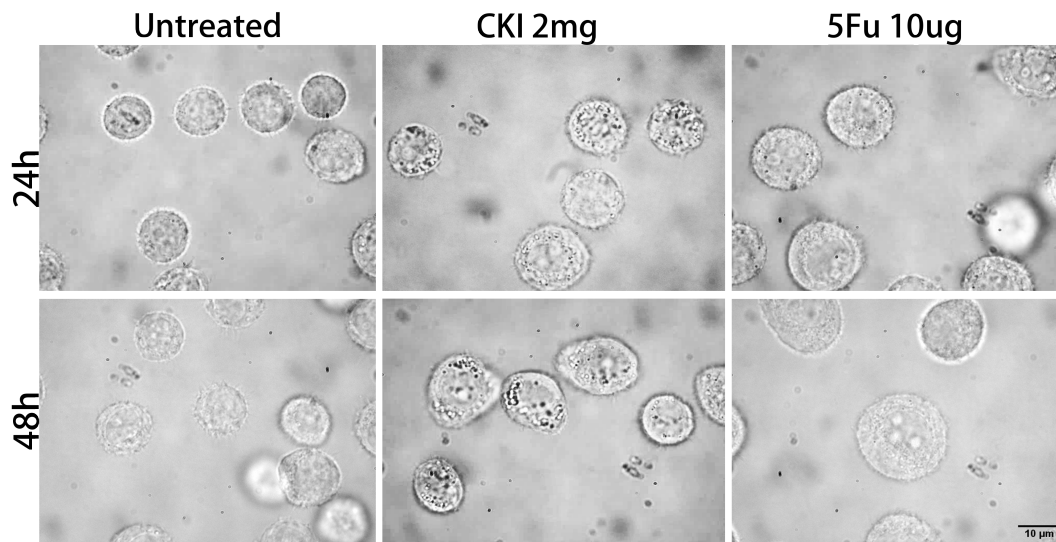

Figure 4. Cell morphology. a-c) The images of BGC823 cells after CKI/5Fu treatment for 24h in bright field; e-f) The images of BGC823 cells after CKI/5Fu treatment for 48h.

#### 150 **RS of Intracellular vesicles and cytoplasm**

151 For analyzing the composition of enormous IVs and biochemical alteration in the cytoplasm, the  
152 RS from intracellular vesicles, cytoplasm, and nucleus of the same cells were analyzed. We  
153 compared the difference of RS between the Cytoplasm and nucleus, only in the CKI treated group  
154 the RS signals from the cytoplasm were significantly different and lower than the nucleus (figure  
155 5 d-f). The RS from IVs had strong signals exactly at the peaks that the cytoplasm decreased  
156 (figure 5 e). The results from at 24h were the same as at 48h (figure S4). This indicated that the  
157 components fluxing from the cytoplasm to vesicles occurred within the CKI-treated cells. This was  
158 consistent with the cell component degradation process undergoing during apoptosis and  
159 autophagy.

160 The main peaks of vesicles appear in 1746  $\text{cm}^{-1}$  (COOR), 1656  $\text{cm}^{-1}$  (proteins), 1439  $\text{cm}^{-1}$   
161 (carbohydrates/lipids), 1296  $\text{cm}^{-1}$ (lipids), 1199  $\text{cm}^{-1}$  (proteins), 1081  $\text{cm}^{-1}$   
162 (proteins/lipids/glycogen), 1030  $\text{cm}^{-1}$ (proteins/lipids/glycogen). Wherein the new peaks of 1746  
163  $\text{cm}^{-1}$  reflected that a mass of phospholipids was used to construct vesicles. The protein, RNA,  
164 carbohydrates, and lipids signals were enhanced due to deconstructed cell components during  
165 autophagy and apoptosis. We also collected the sub-cellular spectra for the CKI-treated 72h-  
166 group, almost all of the spectra features (Figure S2) are the same as those of the 48h-group. The  
167 only difference was at 1746  $\text{cm}^{-1}$ (COOR), 72h-group did not strong increase like 48h-group. This

168 band is the key difference between lipids and fatty acids in cell components. It suggested fatty  
 169 acids rather than lipids kept increasing in the cytoplasm after CKI treatment.  
 170

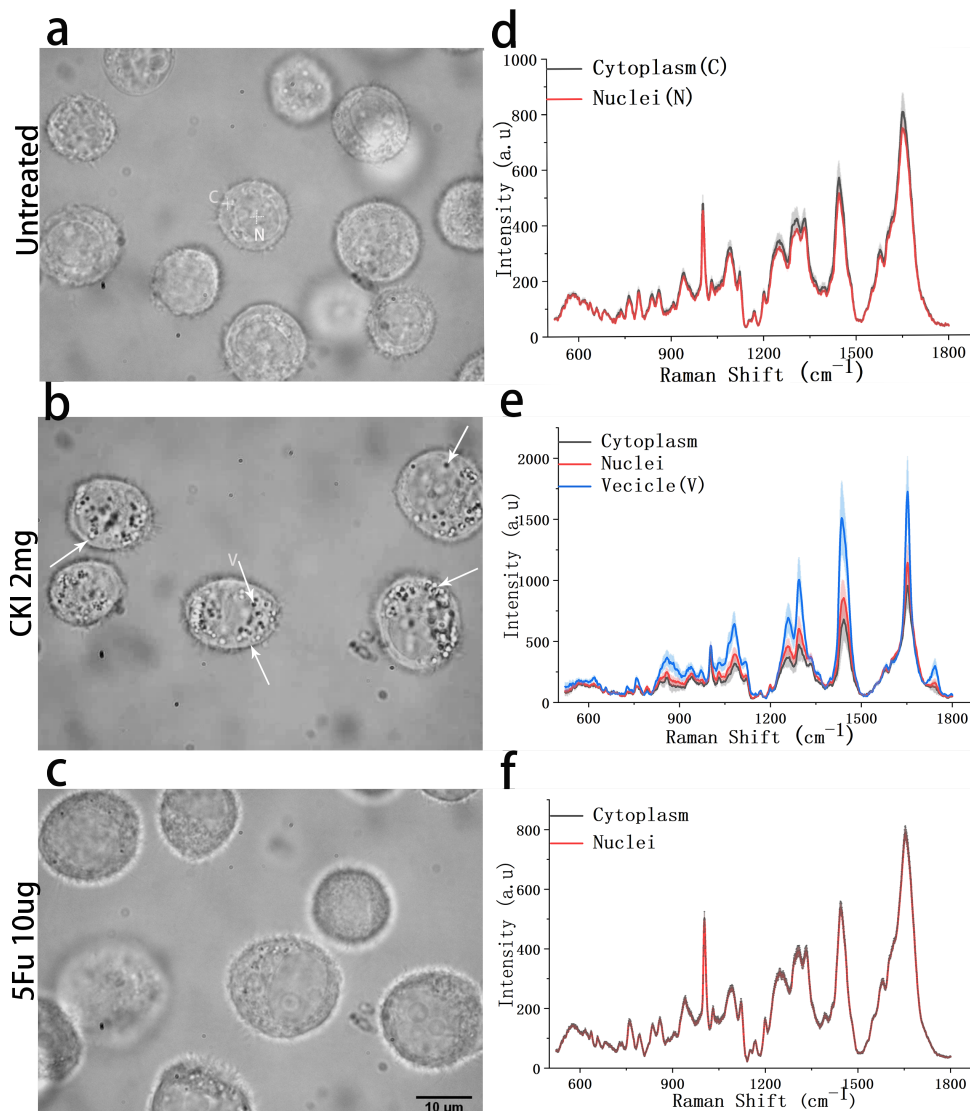

Figure 5. Cell images and subcellular RS of BGC-823 cells. a, d) The image and sub-cellular RS of the same cell without drug-treatment; b, e) The image and sub-cellular RS of the same cell under CKI 2mg/ml treatment; f) The image and sub-cellular RS of the same cell under 5Fu 10ug/ml. Note: all these data were collected after treatment for 48 hours, all RS were presented by mean $\pm$ s.e.m., the light shadow represents the s.e.m

171 To further analyze the cytoplasm alterations companied with IVs accumulation, we used drug-  
 172 treated cytoplasm spectra minus that of the untreated group to present the drug-mediated  
 173 difference in spectral intensity. For 5Fu-treated cells, the subtraction results were mostly negative  
 174 values for both 24h and 48h (figure6.a, b). The main decrease occurred at peaks of 1658 cm<sup>-1</sup>  
 175 (Amide I, proteins) 1331 cm<sup>-1</sup>(collagen),794 cm<sup>-1</sup>(DNA),1092 cm<sup>-1</sup>(DNA), 1247cm<sup>-1</sup>(Amide III,  
 176 protein) 1568 cm<sup>-1</sup>(Amide I, protein) 1334 cm<sup>-1</sup>(protein) due to 5Fu inhibition of thymidylate  
 177 synthase and incorporation of its metabolites into RNA and DNA and mainly targeting at S



178 phage<sup>27</sup>. As for the CKI-treated (2mg/mL) cells, the subtraction results of cytoplasm spectra were  
179 different from each other, which mainly expressed a negative value at 24h and a positive one at  
180 48h. For 24h, almost all component was decreased which was reflected by the lower intensity at  
181 1660  $\text{cm}^{-1}$ (acyl chain), 1576  $\text{cm}^{-1}$ (DNA), 1448  $\text{cm}^{-1}$ (Lipids/proteins), 1332  $\text{cm}^{-1}$ (Proteins), 1304  
182  $\text{cm}^{-1}$ (Lipid/protein)1252  $\text{cm}^{-1}$ (Cytosine/adenine), 1122  $\text{cm}^{-1}$  (proteins/lipids) and 1003 $\text{cm}^{-1}$ (Phe  
183 vs(CC)ring). Interestingly, the peak intensity at 843  $\text{cm}^{-1}$  was increased compared to  
184 phospholipids, which suggested that the increased cell activities related to the membrane. It was  
185 consistent with the strong uprising lipids signals at 48h in peaks 1743  $\text{cm}^{-1}$ (COOR),1436  $\text{cm}^{-1}$   
186 (acyl chain), 1077  $\text{cm}^{-1}$  (Typical phospholipids). We infer that CKI might facilitate cell activities or  
187 pathways involving lipids/ fatty acids. The increasing of lipids signal and the disappearance of RS  
188 signals near 1745  $\text{cm}^{-1}$  indicated the increase of lipids signal mainly resulted from the increase of  
189 fatty acid in the cytoplasm. Lipids are required to maintain cellular structure, supply energy, and  
190 involved in cell signaling. Lipid metabolism participates in the regulation of many cellular  
191 processes such as cell growth, proliferation, survival, apoptosis, autophagy.<sup>42, 43</sup> Thus, related  
192 lipids/fat acid alterations could be one of the CKI anticancer mechanisms, considering the key  
193 role autophagy played in lipid metabolism and balance in cells and the cytotoxicity of free fatty  
194 acid.<sup>44-46</sup>  
195

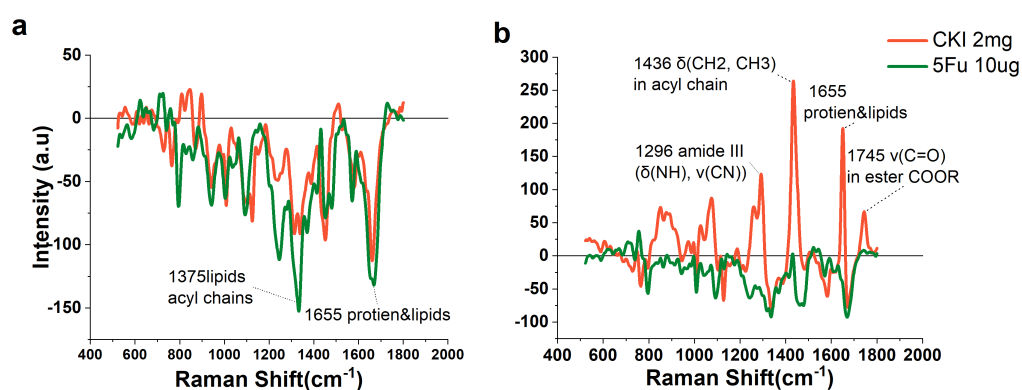

Figure 6. Cytoplasm RS of BGC-823 cells treated with CKI or 5Fu. a) the RS of drug-treated cytoplasm RS subtracting the untreated cytoplasm RS at 24h; b) the RS of drug-treated cytoplasm subtracting the untreated one at 48h.

## 196 CONCLUSIONS

197 Through a sub-cellular Raman spectroscopic analysis at the resolution of IVs, we captured multi-  
198 level cell changes caused by multi-targeted drug CKI. CKI caused DNA replication/repair  
199 inhibition was reflected by nucleic acid-related peaks decrease at cell nucleus RS. The enormous  
200 intracellular vesicle accumulation related to CKI induced apoptosis and autophagy was observed.  
201 The RS from intracellular vesicles and cytoplasm displayed the cell component degradation  
202 process meditated by IVs. The lipids/fat acid alterations showed that the lipids metabolism role in  
203 CKI anticancer effect and the mechanism needs to be further investigated. In general, we proved  
204 sub-cellular Raman spectroscopy is a powerful tool to explore the internal cell complexity,  
205 especially for a multi-target drug investigation.

## 206 ASSOCIATED CONTENT

207 **Supporting Information**

208 Assignments of Raman bands in spectra for cells (Table S1). Nucleus Raman spectroscopy at 48h (Figure  
209 S1). Cytoplasm Raman spectroscopy at 72h (Figure S2) (PDF)

210 **AUTHOR INFORMATION**

211 **Corresponding Author**

212 \* E-mail: yap@pku.edu.cn

213 **Author Contributions**

214 All authors have given approval to the final version of the manuscript.

215 **Notes**

216 The authors declare no competing financial interest.

217 **ACKNOWLEDGMENT**

218 This work was supported by National Natural Science Foundation of China (NSFC)  
219 (U19A2007,32150026 ).

220 **REFERENCE**

- 221 [1] R. Zhang, X. Zhu, H. Bai, K. Ning *Front Pharmacol.* **2019**, *10*, 123.  
222 [2] W. Xi-cai *Journal of Modern Oncology.* **2010**.  
223 [3] Z. Zhao, H. Fan, T. Higgins, J. Qi, D. Haines, A. Trivett, J. J. Oppenheim, H. Wei, J. Li, H. Lin, O.  
224 M. Howard *Cancer Lett.* **2014**, *355*, 232-241.  
225 [4] H. Wei *China Cancer.* **2010**.  
226 [5] M. Sun, H. Cao, L. Sun, S. Dong, Y. Bian, J. Han, L. Zhang, S. Ren, Y. Hu, C. Liu, L. Xu, P. Liu *Evid*  
227 *Based Complement Alternat Med.* **2012**, *2012*, 373219.  
228 [6] Y. Ma, H. Gao, J. Liu, L. Chen, Q. Zhang, Z. Wang *Journal of Liquid Chromatography & Related*  
229 *Technologies.* **2013**, *37*, 207-220.  
230 [7] T. N. Aung, S. Nourmohammadi, Z. Qu, Y. Harata-Lee, J. Cui, H. Y. Shen, A. J. Yool, T. Pukala, H.  
231 Du, R. D. Kortschak, W. Wei, D. L. Adelson *Sci Rep.* **2019**, *9*, 14200.  
232 [8] J. Cui, Z. Qu, Y. Harata-Lee, T. Nwe Aung, H. Shen, W. Wang, D. L. Adelson *BMC Cancer.* **2019**,  
233 *19*, 103.  
234 [9] W. Wang, R. L. You, W. J. Qin, L. N. Hai, M. J. Fang, G. H. Huang, R. X. Kang, M. H. Li, Y. F. Qiao,  
235 J. W. Li, A. P. Li *Acta Pharmacol Sin.* **2015**, *36*, 676-679.  
236 [10] J. Q. Zhang, Y. M. Li, T. Liu, W. T. He, Y. T. Chen, X. H. Chen, X. Li, W. C. Zhou, J. F. Yi, Z. J. Ren  
237 *World J Gastroenterol.* **2010**, *16*, 4281-4290.  
238 [11] X. J. Shi, D. D. Zhu, L. Li, Z. Wang, G. Yuan, D. G. Yuan, B. Zhu *Latin American Journal of*  
239 *Pharmacy.* **2019**, *38*, 924-930.  
240 [12] D. Zhang, J. Wu, K. Wang, X. Duan, S. Liu, B. Zhang *Medicine (Baltimore).* **2018**, *97*, e0127.  
241 [13] T. Fang, W. Shang, C. Liu, Y. Liu, A. Ye *Anal Chem.* **2020**, *92*, 10433-10441.  
242 [14] Y. Zhang, J. Xu, Y. Yu, W. Shang, A. Ye *Molecules.* **2018**, *23*, 2903.  
243 [15] Z. Farhane, F. Bonnier, A. Casey, H. J. Byrne *Analyst.* **2015**, *140*, 4212-4223.  
244 [16] Y. Zhang, L. Jin, J. Xu, Y. Yu, L. Shen, J. Gao, A. Ye *Analyst.* **2017**, *143*, 164-174.  
245 [17] H. Nawaz, F. Bonnier, A. D. Meade, F. M. Lyng, H. J. Byrne *Analyst.* **2011**, *136*, 2450-2463.

- 246 [18] H. Nawaz, A. Garcia, A. D. Meade, F. M. Lyng, H. J. Byrne *Analyst*. **2013**, *138*, 6177-6184.  
247 [19] Z. Farhane, F. Bonnier, O. Howe, A. Casey, H. J. Byrne *J Biophotonics*. **2018**, *11*.  
248 [20] S. F. El-Mashtoly, H. K. Yosef, D. Petersen, L. Mavarani, A. Maghnouj, S. A. Hahn, C. K<sup>^</sup>tting, K.  
249 Gerwert *Analytical chemistry*. **2015**, *87* 14, 7297-7304.  
250 [21] H. K. Yosef, L. Mavarani, A. Maghnouj, S. A. Hahn, S. F. El-Mashtoly, K. Gerwert *Analytical and*  
251 *Bioanalytical Chemistry*. **2015**, *407*, 8321 - 8331.  
252 [22] W. Strober *Curr Protoc Immunol*. **2015**, *111*, A3 B 1-A3 B 3.  
253 [23] M. A. Hongfei, Y. A. Zhang *Chinese Science Bulletin*. **2013**, *58*.  
254 [24] Z. Yong, Y. Anpei, W. Cheng *Acta Optica Sinica*. **2010**, *30*, 491-497.  
255 [25] L. A. Austin, S. Osseiran, C. L. Evans *Analyst*. **2016**, *141*, 476-503.  
256 [26] Z. Qu, J. Cui, Y. Harata-Lee, T. N. Aung, Q. Feng, J. M. Raison, R. D. Kortschak, D. L. Adelson  
257 *Oncotarget*. **2016**, *7*, 66003-66019.  
258 [27] D. B. Longley, D. P. Harkin, P. G. Johnston *Nat Rev Cancer*. **2003**, *3*, 330-338.  
259 [28] H. Shen, Z. Qu, Y. Harata-Lee, T. N. Aung, J. Cui, W. Wang, R. D. Kortschak, D. L. Adelson *Front*  
260 *Oncol*. **2019**, *9*, 632.  
261 [29] J. Cui, Z. Qu, Y. Harata-Lee, H. Shen, T. N. Aung, W. Wang, R. D. Kortschak, D. L. Adelson *PLoS*  
262 *One*. **2020**, *15*, e0236395.  
263 [30] W. Zhou, J. Wu, Y. Zhu, Z. Meng, X. Liu, S. Liu, M. Ni, S. Jia, J. Zhang, S. Guo *BMC Complement*  
264 *Med Ther*. **2020**, *20*, 6.  
265 [31] A. L. Batista de Carvalho, M. Pilling, P. Gardner, J. Doherty, G. Cinque, K. Wehbe, C. Kelley, L.  
266 A. Batista de Carvalho, M. P. Marques *Faraday Discuss*. **2016**, *187*, 273-298.  
267 [32] I. Notingher, L. L. Hench *Expert Rev Med Devices*. **2006**, *3*, 215-234.  
268 [33] I. Notingher *Sensors*. **2007**, *7*, 1343-1358.  
269 [34] S. G. Kruglik, F. Royo, J. M. Guigner, L. Palomo, O. Seksek, P. Y. Turpin, I. Tatischeff, J. M. Falcon-  
270 Perez *Nanoscale*. **2019**, *11*, 1661-1679.  
271 [35] J. De Gelder, K. De Gussem, P. Vandenaabeele, L. Moens *Journal of Raman Spectroscopy*. **2007**,  
272 *38*, 1133-1147.  
273 [36] S. Verrier, A. Zoladek, I. Notingher *Methods in molecular biology*. **2011**, *740*, 179-189.  
274 [37] C. M. Henry, E. Hollville, S. J. Martin *Methods*. **2013**, *61*, 90-97.  
275 [38] S. Rangan, S. Kamal, S. O. Konorov, H. G. Schulze, M. W. Blades, R. F. B. Turner, J. M. Piret  
276 *Biotechnol Bioeng*. **2018**, *115*, 401-412.  
277 [39] S. Patingre, A. Tassa, X. Qu, R. Garuti, X. H. Liang, N. Mizushima, M. Packer, M. D. Schneider,  
278 B. Levine *Cell*. **2005**, *122*, 927-939.  
279 [40] B. Krampe, M. Al-Rubeai *Cytotechnology*. **2010**, *62*, 175-188.  
280 [41] T. Fang, W. Shang, C. Liu, J. Xu, D. Zhao, Y. Liu, A. Ye *Anal Chem*. **2019**, *91*, 9932-9939.  
281 [42] B. Jaishy, E. D. Abel *J Lipid Res*. **2016**, *57*, 1619-1635.  
282 [43] C. Dall'Armi, K. A. Devereaux, G. Di Paolo *Curr Biol*. **2013**, *23*, R33-45.  
283 [44] J. A. Rodriguez-Navarro, A. M. Cuervo *Semin Immunopathol*. **2010**, *32*, 343-353.  
284 [45] P. Christian, J. Sacco, K. Adeli *Biochim Biophys Acta*. **2013**, *1831*, 819-824.  
285 [46] S. Beloribi-Djefaflija, S. Vasseur, F. Guillaumond *Oncogenesis*. **2016**, *5*, e189.

286

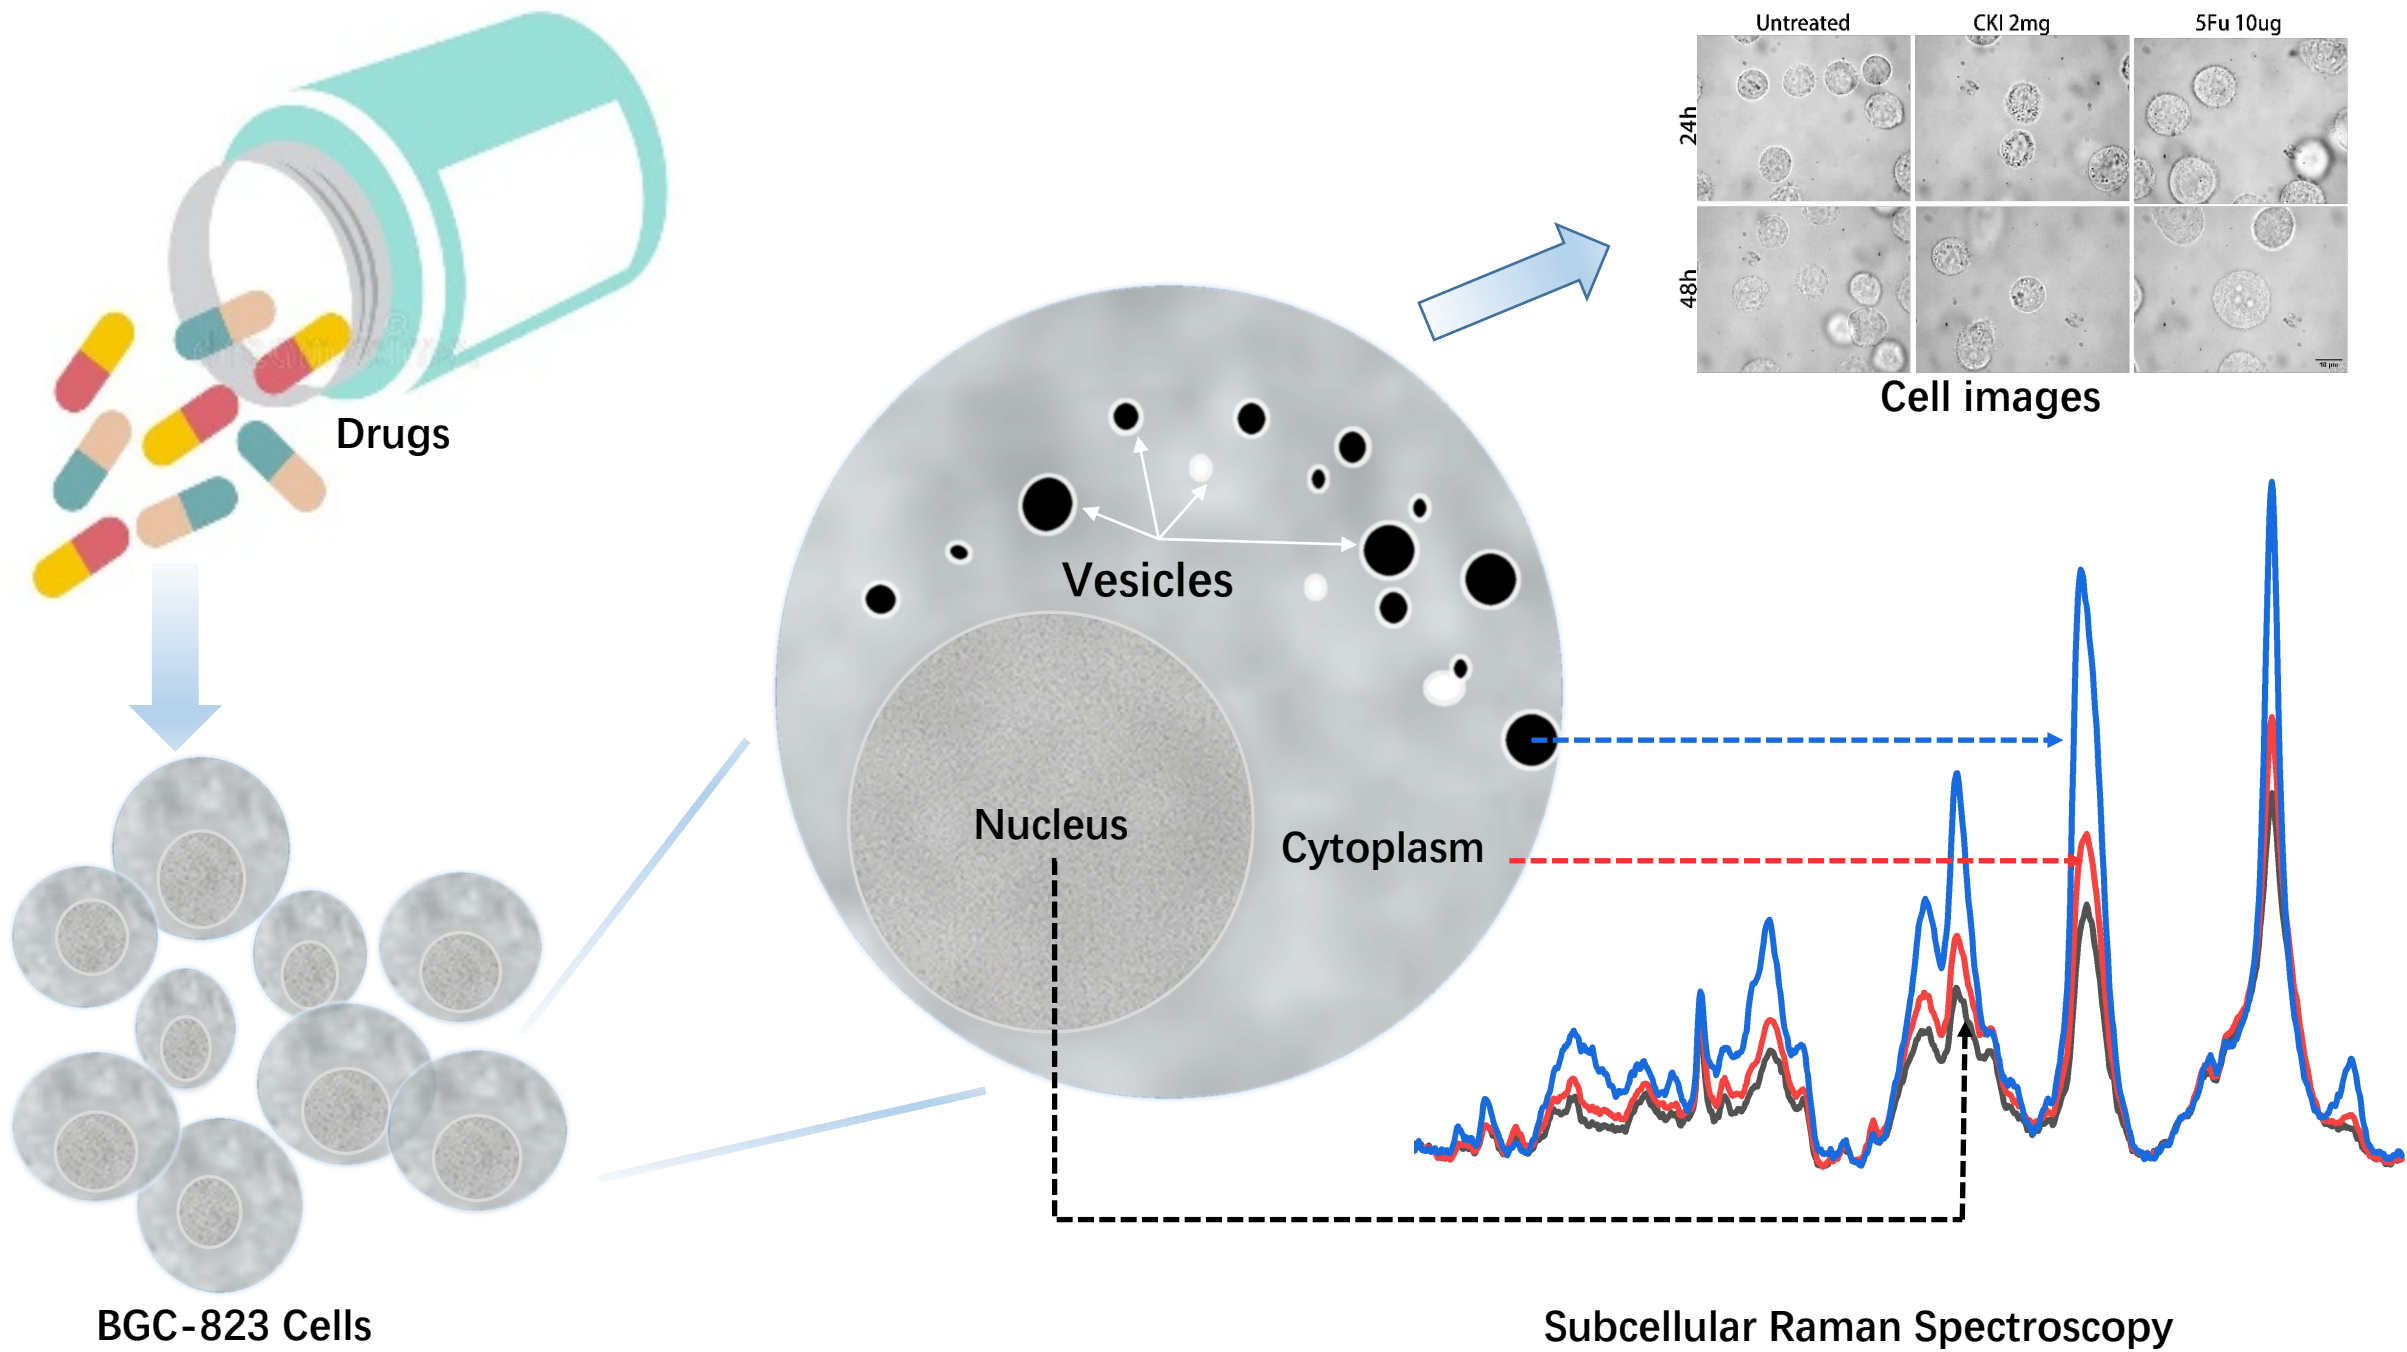

Source: https://www.biorxiv.org/content/10.1101/2022.03.24.485691v1.full.pdf
